# Supplementary material for: Increased Sensitivity of Mice Lacking Extrasynaptic δ-Containing GABAA Receptors to Histamine Receptor 3 Antagonists
Source: Front Pharmacol. 2020 May 6;11:594. doi: 10.3389/fphar.2020.00594 (PMC7218123; doi:10.3389/fphar.2020.00594)
Supplement: Supplementary file 1 [file Table_1.xlsx]

## Sheet: EEG_baseline_power_bands
Output of statistical test with “nparLD” R package: "F1 LD F1 Model"
Noguchi K., Gel Y.R., Brunner E. & Konietschke F. (2012) nparLD: an R software package for the nonparametric analysis of longitudinal data in factorial experiments. Journal of Statistical Software 50
Power of frequencies bands
delta					theta
$Wald.test					$Wald.test
	Statistic	df	p-value			Statistic	df	p-value
Genotype	16.8529	1	4.03917e-05		Genotype	10.5208	1	0.00118038
Time	304.064	15	7.99078e-56		Time	133.654	15	4.0838e-21
Genotype:Time	136.956	15	9.15995e-22		Genotype:Time	47.0382	15	3.63045e-05
alpha					sigma
$Wald.test					$Wald.test
	Statistic	df	p-value			Statistic	df	p-value
Genotype	15.029	1	0.000105875		Genotype	27.4791	1	1.58803e-07
Time	325.435	15	2.83493e-60		Time	360.946	15	1.0761e-67
Genotype:Time	87.9881	15	2.35018e-12		Genotype:Time	92.6869	15	3.11909e-13
beta					gamma1					gamma2
$Wald.test					$Wald.test					$Wald.test
	Statistic	df	p-value			Statistic	df	p-value			Statistic	df	p-value
Genotype	17.8568	1	2.38168e-05		Genotype	0.0919564	1	0.761705		Genotype	2.36738	1	0.123895
Time	254.421	15	1.52415e-45		Time	912.513	15	7.40231e-185		Time	1575.72	15	0
Genotype:Time	123.099	15	4.72956e-19		Genotype:Time	88.9346	15	1.56678e-12		Genotype:Time	103.649	15	2.64281e-15

## Sheet: EEG_ciproxifan_treatment
Output of statistical test with “nparLD” R package: "F2 LD F1 Model"
Noguchi K., Gel Y.R., Brunner E. & Konietschke F. (2012) nparLD: an R software package for the nonparametric analysis of longitudinal data in factorial experiments. Journal of Statistical Software 50
Ciproxifan treatment
Power of frequencies bands
delta					theta
$Wald.test					$Wald.test
	Statistic	df	p-value			Statistic	df	p-value
Treatment	23.9183	2	6.4003e-06		Treatment	27.0681	2	1.32505e-06
Genotype	1.13813	1	0.286048		Genotype	4.00966	1	0.0452402
Time	4103.41	23	0		Time	1940.08	23	0
Treatment:Genotype	0.241307	2	0.886341		Treatment:Genotype	0.5484	2	0.76018
Treatment:Time	140.59	46	1.62938e-11		Treatment:Time	122.448	46	7.24171e-09
Genotype:Time	163.626	23	3.44261e-23		Genotype:Time	92.1238	23	3.11983e-10
Treatment:Genotype:Time	102.739	46	3.22213e-06		Treatment:Genotype:Time	32.4189	46	0.935012
alpha					sigma
$Wald.test					$Wald.test
	Statistic	df	p-value			Statistic	df	p-value
Treatment	24.7831	2	4.15359e-06		Treatment	36.523	2	1.17256e-08
Genotype	4.71769	1	0.0298538		Genotype	3.85755	1	0.0495225
Time	2764.31	23	0		Time	2389.34	23	0
Treatment:Genotype	1.28571	2	0.525789		Treatment:Genotype	1.12955	2	0.568489
Treatment:Time	155.728	46	7.65758e-14		Treatment:Time	152.515	46	2.43168e-13
Genotype:Time	121.406	23	2.32227e-15		Genotype:Time	97.8527	23	3.29804e-11
Treatment:Genotype:Time	81.4401	46	0.000990437		Treatment:Genotype:Time	69.5106	46	0.0141517
beta					gamma1					gamma2
$Wald.test					$Wald.test					$Wald.test
	Statistic	df	p-value			Statistic	df	p-value			Statistic	df	p-value
Treatment	19.8077	2	4.99816e-05		Treatment	9.56483	2	0.00837577		Treatment	25.8804	2	2.39963e-06
Genotype	2.09927	1	0.14737		Genotype	0.00679645	1	0.934296		Genotype	0.0130914	1	0.908907
Time	658.401	23	2.52298e-124		Time	1632.89	23	0		Time	20769.1	23	0
Treatment:Genotype	0.644617	2	0.724475		Treatment:Genotype	0.836171	2	0.658306		Treatment:Genotype	0.742174	2	0.689984
Treatment:Time	73.0763	46	0.00672172		Treatment:Time	148.16	46	1.14782e-12		Treatment:Time	186.872	46	6.86513e-19
Genotype:Time	97.1781	23	4.30496e-11		Genotype:Time	189.287	23	4.17517e-28		Genotype:Time	525.056	23	2.13312e-96
Treatment:Genotype:Time	62.4113	46	0.0537753		Treatment:Genotype:Time	39.5141	46	0.739063		Treatment:Genotype:Time	49.4703	46	0.336426
relative stage amount
WAKE amount					NREM amount					REM amount
$Wald.test					$Wald.test					$Wald.test
	Statistic	df	p-value			Statistic	df	p-value			Statistic	df	p-value
Treatment	83.4128	2	7.71168e-19		Treatment	100.916	2	1.21975e-22		Treatment	37.0686	2	8.92581e-09
Genotype	0.144355	1	0.703989		Genotype	0.111545	1	0.738392		Genotype	2.37202	1	0.123527
Time	13746.3	23	0		Time	14459.9	23	0		Time	590.692	23	4.08708e-110
Treatment:Genotype	4.23535	2	0.120311		Treatment:Genotype	6.384	2	0.0410896		Treatment:Genotype	2.00153	2	0.367598
Treatment:Time	171.63	46	2.21314e-16		Treatment:Time	258.658	46	2.08879e-31		Treatment:Time	122.993	46	6.06644e-09
Genotype:Time	79.8034	23	3.4165e-08		Genotype:Time	190.067	23	2.95053e-28		Genotype:Time	495.095	23	3.69978e-90
Treatment:Genotype:Time	53.3346	46	0.212974		Treatment:Genotype:Time	103.342	46	2.70031e-06		Treatment:Genotype:Time	181.426	46	5.5017e-18
bout duration
WAKE amount					NREM amount					REM amount
$Wald.test					$Wald.test					$Wald.test
	Statistic	df	p-value			Statistic	df	p-value			Statistic	df	p-value
Treatment	63.0663	2	2.01992e-14		Treatment	78.6245	2	8.45109e-18		Treatment	37.1042	2	8.76872e-09
Genotype	0.010029	1	0.920229		Genotype	0.0290271	1	0.864716		Genotype	2.22998	1	0.135356
Time	3212.29	23	0		Time	13288.6	23	0		Time	762.068	23	3.5959e-146
Treatment:Genotype	2.42228	2	0.297857		Treatment:Genotype	9.70319	2	0.00781588		Treatment:Genotype	3.09909	2	0.212345
Treatment:Time	-440.019	46	NA		Treatment:Time	184.58	46	1.65217e-18		Treatment:Time	117.558	46	3.48221e-08
Genotype:Time	182.533	23	8.38771e-27		Genotype:Time	349.169	23	4.68988e-60		Genotype:Time	440.224	23	8.90911e-79
Treatment:Genotype:Time	25.9118	46	0.992658		Treatment:Genotype:Time	102.088	46	3.89634e-06		Treatment:Genotype:Time	141.48	46	1.19617e-11

## Sheet: post_hoc_tests_pvalues
Post-hoc analyses of factors separately
Genotype:		Treatment:
wt vs ko		sal vs cip3		sal - saline
		sal vs cip10		cip3 - ciproxifan 3 mg/kg
		cip3 vs cip10		cip10 - ciproxifan 10 mg/kg
Output of statistical test with “nparLD” R package: "F1 LD F1 Model"
Noguchi K., Gel Y.R., Brunner E. & Konietschke F. (2012) nparLD: an R software package for the nonparametric analysis of longitudinal data in factorial experiments. Journal of Statistical Software 50
	Power of frequencies bands
	delta					theta
	wt vs ko				wt vs ko
	sal	cip3	cip10		sal	cip3	cip10
	0.779205	0.371771	0.658862		0.757871	0.107658	0.32564
	sal vs cip3				sal vs cip3
	wt	ko			wt	ko
	0.031513	0.00843279			0.00631307	0.0256668
	sal vs cip10				sal vs cip10
	wt	ko			wt	ko
	0.00676043	5.4436e-05			0.00455406	8.622e-05
	cip3 vs cip10				cip3 vs cip10
	wt	ko			wt	ko
	0.632692	0.0314663			0.592233	0.495728
	alpha					sigma
	wt vs ko				wt vs ko
	sal	cip3	cip10		sal	cip3	cip10
	0.770771	0.313469	0.00557147		0.963701	0.369498	0.00751389
	sal vs cip3				sal vs cip3
	wt	ko			wt	ko
	0.0708189	0.110695			0.0574896	0.0647451
	sal vs cip10				sal vs cip10
	wt	ko			wt	ko
	2.16381e-05	0.00277001			5.84072e-06	2.069e-05
	cip3 vs cip10				cip3 vs cip10
	wt	ko			wt	ko
	0.433836	0.719465			0.228643	0.373254
	beta					gamma1				gamma2
	wt vs ko				wt vs ko				wt vs ko
	sal	cip3	cip10		sal	cip3	cip10		sal	cip3	cip10
	0.918112	0.314749	0.0725766		0.522274	0.43774	0.591223		0.527778	0.486692	0.364352
	sal vs cip3				sal vs cip3				sal vs cip3
	wt	ko			wt	ko			wt	ko
	0.0926132	0.332195			0.518103	0.401586			0.678321	0.330791
	sal vs cip10				sal vs cip10				sal vs cip10
	wt	ko			wt	ko			wt	ko
	0.00184263	0.00108281			0.0265024	0.0459326			0.000212134	0.00188081
	cip3 vs cip10				cip3 vs cip10				cip3 vs cip10
	wt	ko			wt	ko			wt	ko
	0.926486	0.495459			0.176014	0.442569			0.0823588	0.19681
	relative stage amount
	WAKE amount					NREM amount					REM amount
	wt vs ko				wt vs ko					wt vs ko
	sal	cip3	cip10		sal	cip3	cip10			sal	cip3	cip10
	0.372794	0.155754	0.383359		0.0845397	0.0858266	0.451127			0.816771	0.555281	1.67056e-07
	sal vs cip3				sal vs cip3					sal vs cip3
	wt	ko			wt	ko				wt	ko
	0.00613582	6.46999e-11			0.00198694	2.81082e-18				0.410088	0.563744
	sal vs cip10				sal vs cip10					sal vs cip10
	wt	ko			wt	ko				wt	ko
	3.19097e-08	1.61412e-11			2.5846e-08	2.77646e-11				0.000524318	0.0147188
	cip3 vs cip10				cip3 vs cip10					cip3 vs cip10
	wt	ko			wt	ko				wt	ko
	0.00575292	0.520393			0.0107215	0.60157				6.81623e-18	0.0591534
	bout duration
	WAKE					NREM					REM
	wt vs ko				wt vs ko					wt vs ko
	sal	cip3	cip10		sal	cip3	cip10			sal	cip3	cip10
	0.163066	0.295986	0.649084		0.491836	0.0116748	0.24529			0.891494	0.71284	8.88603e-08
	sal vs cip3				sal vs cip3					sal vs cip3
	wt	ko			wt	ko				wt	ko
	0.0111647	3.41692e-08			0.0142917	1.81556e-07				0.420015	0.55036
	sal vs cip10				sal vs cip10					sal vs cip10
	wt	ko			wt	ko				wt	ko
	1.89141e-07	3.68769e-05			2.25398e-09	1.2916e-10				0.000263894	0.0187178
	cip3 vs cip10				cip3 vs cip10					cip3 vs cip10
	wt	ko			wt	ko				wt	ko
	0.0428286	0.653829			6.95835e-05	0.278025				4.4772e-16	0.0811882
The Holm-Bonferroni correction
new alpha level = alpha level/ (number of comparisons – rank +1)
											relative stage amount			bout duration
alpha level	rank	number of comparisons	significance threshold	delta	theta	alpha	sigma	beta	gamma1	gamma2	wake	nrem	rem	wake	nrem	rem
0.05	1	9	0.00555556	5.4436e-05	8.622e-05	2.16381e-05	5.84072e-06	0.00108281	0.0265024	0.000212134	1.61412e-11	2.81082e-18	6.81623e-18	3.41692e-08	1.2916e-10	4.4772e-16
0.05	2	9	0.00625	0.00676043	0.00455406	0.00277001	2.069e-05	0.00184263	0.0459326	0.00188081	6.46999e-11	2.77646e-11	1.67056e-07	1.89141e-07	2.25398e-09	8.88603e-08
0.05	3	9	0.00714286	0.00843279	0.00631307	0.00557147	0.00751389	0.0725766	0.176014	0.0823588	3.19097e-08	2.5846e-08	0.000524318	3.68769e-05	1.81556e-07	0.000263894
0.05	4	9	0.00833333	0.0314663	0.0256668	0.0708189	0.0574896	0.0926132	0.401586	0.19681	0.00575292	0.00198694	0.0147188	0.0111647	6.95835e-05	0.0187178
0.05	5	9	0.01	0.031513	0.107658	0.110695	0.0647451	0.314749	0.43774	0.330791	0.00613582	0.0107215	0.0591534	0.0428286	0.0116748	0.0811882
0.05	6	9	0.0125	0.371771	0.32564	0.313469	0.228643	0.332195	0.442569	0.364352	0.155754	0.0845397	0.410088	0.163066	0.0142917	0.420015
0.05	7	9	0.0166667	0.632692	0.495728	0.433836	0.369498	0.495459	0.518103	0.486692	0.372794	0.0858266	0.555281	0.295986	0.24529	0.55036
0.05	8	9	0.025	0.658862	0.592233	0.719465	0.373254	0.918112	0.522274	0.527778	0.383359	0.451127	0.563744	0.649084	0.278025	0.71284
0.05	9	9	0.05	0.779205	0.757871	0.770771	0.963701	0.926486	0.591223	0.678321	0.520393	0.60157	0.816771	0.653829	0.491836	0.891494

## Sheet: EEG_FMH_treatment
Output of statistical test with “nparLD” R package: "F2 LD F1 Model"
Noguchi K., Gel Y.R., Brunner E. & Konietschke F. (2012) nparLD: an R software package for the nonparametric analysis of longitudinal data in factorial experiments. Journal of Statistical Software 50
FMH treatment
relative stage amount
WAKE amount					NREM amount					REM amount
$Wald.test					Wald.test					$Wald.test
	Statistic	df	p-value			Statistic	df	p-value			Statistic	df	p-value
Treatment	78.72	1	7.15691e-19		Treatment	78.4091	1	8.3767e-19		Treatment	4.53326	1	0.0332422
Genotype	0.884089	1	0.347084		Genotype	0.622604	1	0.430081		Genotype	0.0124303	1	0.911227
Time	214.61	23	4.87749e-33		Time	174.326	23	3.15224e-25		Time	381.268	23	1.25792e-66
Treatment:Genotype	0.920602	1	0.337317		Treatment:Genotype	0.464436	1	0.495558		Treatment:Genotype	3.78966	1	0.0515701
Treatment:Time	116.62	23	1.68006e-14		Treatment:Time	38.5235	23	0.0223646		Treatment:Time	62.8663	23	1.45628e-05
Genotype:Time	6.78664	23	0.999578		Genotype:Time	9.11889	23	0.99554		Genotype:Time	35.3453	23	0.0480486
Treatment:Genotype:Time	14.8029	23	0.901559		Treatment:Genotype:Time	30.6343	23	0.132044		Treatment:Genotype:Time	55.3736	23	0.000173041
Post-hoc analyses of factors separately
Genotype:		Treatment:
wt vs ko		sal vs FMH		sal - saline
Output of statistical test with “nparLD” R package: "F1 LD F1 Model"
Noguchi K., Gel Y.R., Brunner E. & Konietschke F. (2012) nparLD: an R software package for the nonparametric analysis of longitudinal data in factorial experiments. Journal of Statistical Software 50
relative stage amount
WAKE amount					NREM amount			REM amount
wt vs ko				wt vs ko			wt vs ko
sal	FMH			sal	FMH		sal	FMH
0.712522	0.213562			0.647352	0.348171		0.245019	0.0944355
sal vs FMH				sal vs FMH			sal vs FMH
wt	ko			wt	ko		wt	ko
1.3056e-27	1.45348e-05			4.05755e-27	6.70339e-06		0.0224591	0.855106
The Holm-Bonferroni correction
new alpha level = alpha level/ (number of comparisons – rank +1)
				relative stage amount
alpha level	rank	number of comparisons	threshold	wake	nrem	rem
0.05	1	4	0.0125	1.3056e-27	4.05755e-27	0.0224591
0.05	2	4	0.0166667	1.45348e-05	6.70339e-06	0.0944355
0.05	3	4	0.025	0.213562	0.348171	0.245019
0.05	4	4	0.05	0.712522	0.647352	0.855106
